# Supplementary material for: Every apple has a voice: using stable isotopes to teach about food sourcing and the water cycle
Source: Copernicus journal article supplement (doi:10.5194/hess-21-3799-2017), 2017-07-25
Supplement: Supplementary file 2 [file hess-21-3799-2017-supplement.zip]

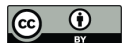

## *Supplement of*

# **Every apple has a voice: using stable isotopes to teach about food sourcing and the water cycle**

**Erik Oerter et al.**

*Correspondence to:* Erik Oerter (erikjoerter@gmail.com)

- hess-21-3799-2017-supplement-title-page.pdf
- HESS-2017-115\_SuppMatl\_vR1
  - HESS-2017-115-SupplementaryMaterial\_vR1.pdf
  - d18O\_hover\_Global\_MJJ.html
  - d18O\_hover\_NorthAmerica\_MJJ.html
  - d2H\_hover\_Global\_MJJ.html
  - d2H\_hover\_NorthAmerica\_MJJ.html

The copyright of individual parts of the supplement might differ from the CC BY 3.0 License.
